# Supplementary material
Source: publisher figshare collection journal article supplement (https://tandf.figshare.com/ndownloader/files/34514881)
Supplement: Supplementary file 1 [file 34514881]

Table S2. Moderation analysis 6 & 12 month relapse

|  | ***B*** | **SE** | ***Z*** | ***p*-value** | **Odds ratio** | **95% CI odds ratio** |
| --- | --- | --- | --- | --- | --- | --- |
| **Any use at 6-month FU** | | | | | | |
| Craving | .065 | .042 | 1.54 | .12 | 1.07 | 0.98-4.38 |
| Presence MiL | .018 | .032 | .57 | .57 | 1.20 | 0.96-1.08 |
| Moderation | .002 | .004 | .50 | .62 | 1.00 | 0.99-1.01 |
| **≥ 3 consecutive days use at 6-month FU** | | | | | | |
| Craving | .062 | .043 | 1.46 | .15 | 1.06 | 0.98-1.16 |
| Presence MiL | .066 | .037 | 1.77 | .08 | 1.07 | 0.99-1.15 |
| Moderation | .002 | .005 | .56 | .58 | 1.00 | 0.99-1.01 |
| **Any use at 12-month FU** | | | | | | |
| Craving | .132 | .701 | 1.88 | .06 | 1.14 | 0.99-1.31 |
| Presence MiL | .077 | .046 | 1.69 | .09 | 1.08 | 0.99-1.18 |
| Moderation | -.002 | .007 | -.22 | .83 | 1.00 | .098-1.01 |
| **≥ 3 consecutive days use at 6-month FU** | | | | | | |
| Craving | .060 | .056 | 1.08 | .28 | 1.06 | 0.95-1.18 |
| Presence MiL | .044 | .044 | 1.01 | .31 | 1.05 | 0.96-1.14 |
| Moderation | -.0089 | .006 | -1.40 | .16 | 0.99 | 0.98-1.00 |
